# Supplementary material for: Identification of quantitative trait loci (QTLs) regulating leaf SPAD value and trichome density in mungbean (Vigna radiata L.) using genotyping-by-sequencing (GBS) approach
Source: PeerJ. 2024 Feb 21;12:e16722. doi: 10.7717/peerj.16722 (PMC10893866; doi:10.7717/peerj.16722)
Supplement: Data S1 [file peerj-12-16722-s005.xlsx]

## Sheet: SPAD_Value
Raw data for SPAD in the RILs (recorded for 2 years)
		SPAD_2020					SPAD_2021
RILNo	R1(M)	R2(M)	Mean			RILNo	R1(M)	R2(M)	Mean
1	31.2	30.8333	31.0167			1	32.4	48.9333	40.6667
2	12.6	13.7667	13.1833			2	16.6	11.7667	14.1833
3	16.8	17.7	17.25			3	20.243	16.8333	18.5382
5	5	5.63333	5.31667			5	5.5	6.39	5.945
6	29.3	46.3333	37.8167			6	56.2	51.9667	54.0833
7	10.9	13.8667	12.3833			7	18.4	13.0333	15.7167
8	23.6	21.5333	22.5667			8	21.4	19.7333	20.5667
10	21.1	19.1	20.1			10	20.4	16.3	18.35
11	14.7	15.4667	15.0833			11	30.9	20.1	25.5
12	13.5	13.3667	13.4333			12	11.3	11.5333	11.4167
13	27.7	25.5667	26.6333			13	27.8	40.9333	34.3667
14	25.8	25.6333	25.7167			14	21.378	30.2	25.789
15	19.6	18.1667	18.8833			15	20.6	14.5	17.55
16	22.5	21.2667	21.8833			16	23.2	18.1333	20.6667
17	17.2	18.2333	17.7167			17	24.678	12.8333	18.7557
18	23.9	26.8667	25.3833			18	31.9	25.5667	28.7333
19	37.4	33.4	35.4			19	29.01	34.3333	31.6717
20	19.2	21.7667	20.4833			20	21.5	25.2333	23.3667
21	25.7	24.6667	25.1833			21	21.8	26.7333	24.2667
22	9	12.3667	10.6833			22	12.5	16.2	14.35
23	20.5	17.6667	19.0833			23	17.4	15.4	16.4
24	14.4	16.7	15.55			24	16.1	19.82	17.96
25	15.7	15.3333	15.5167			25	17.1	13.9333	15.5167
26	18.9	18.0333	18.4667			26	13.3	21.4	17.35
27	25.4	26.5667	25.9833			27	26.765	28.3333	27.5492
28	38.5	34.8333	36.6667			28	35.3	31.1667	33.2333
29	3.6	3.93333	3.76667			29	5.6	2.76333	4.18167
30	3.3	2.5	2.9			30	3.031	2.01633	2.52367
31	29.9	30.7	30.3			31	34	28.02	31.01
32	17	18	17.5			32	20.1	16.029	18.0645
33	28.8	29.0333	28.9167			33	31.6	27.5333	29.5667
34	23.8	22.9	23.35			34	19.9	24.3667	22.1333
35	31.2	33.9667	32.5833			35	36.4	34.8667	35.6333
36	23.9	23.5333	23.7167			36	26.8	20.443	23.6215
37	17.5	19.8333	18.6667			37	29.5	13.8667	21.6833
38	28.2	31.4667	29.8333			38	30.3	37.5667	33.9333
39	30.3	31.8	31.05			39	30.4	35.2667	32.8333
40	37.6	31.5667	34.5833			40	26	31.3667	28.6833
41	25.1	26	25.55			41	29.3	24.3333	26.8167
42	16.9	17.4	17.15			42	19.2	15.68	17.44
43	30.1	28.9667	29.5333			43	29.1	27.1333	28.1167
44	25.5	26.7	26.1			44	27.8	26.9	27.35
46	34.9	33.8333	34.3667			46	35.021	32.1	33.5605
47	14.8	21.2333	18.0167			47	18.7	29.9	24.3
48	23.8	21.1667	22.4833			48	17.6	21.7667	19.6833
49	22.4	23.4	22.9			49	25.9	21.6667	23.7833
50	42.5	37.4667	39.9833			50	33	36.8667	34.9333
51	25.2	30.7333	27.9667			51	36	30.1333	33.0667
52	26.8	26.9667	26.8833			52	31.4	23.8	27.6
53	24.8	21.0667	22.9333			53	20.6	18.6333	19.6167
54	31.4	29.1667	30.2833			54	23.9	32.8333	28.3667
55	29.5	28.7667	29.1333			55	26.9	30.6667	28.7833
56	37	33.0333	35.0167			56	24.8	37.3667	31.0833
57	14.9	18.4	16.65			57	18.1	22.5333	20.3167
58	23.1	22.9667	23.0333			58	22.8	21.3	22.05
60	25.8	26.3	26.05			60	29.4	23.8667	26.6333
61	14.4	14.7	14.55			61	12.2	17.4333	14.8167
62	36.3	36.3667	36.3333			62	38.876	34.9333	36.9047
63	19.4	19.3	19.35			63	21.5	17.4	19.45
66	28.5	27.4333	27.9667			66	30.5	21.98	26.24
67	24.1	24.2	24.15			67	23.3	26.1	24.7
68	42	43.8667	42.9333			68	47.8972	40.7	44.2986
69	30.7	30.9667	30.8333			69	30.7	32.7	31.7
71	25.9	26.5333	26.2167			71	23.3	29.1333	26.2167
72	43.2	44.1333	43.6667			72	42.5	47.4667	44.9833
73	27.1	27.1	27.1			73	28.9421	25.4	27.1711
74	28	22.4333	25.2167			74	21.5	16.8667	19.1833
75	30.2	30.3	30.25			75	32.5	27.8667	30.1833
76	35.8	36.3333	36.0667			76	39.2	33.3	36.25
77	41.8	41.2	41.5			77	45.2	36.7333	40.9667
78	14.2	9.33333	11.7667			78	5.6	7.1	6.35
81	30.9	29.3	30.1			81	22.185	35.3	28.7425
82	28.3	26.7333	27.5167			82	24.9	27.5667	26.2333
83	15	14.7333	14.8667			83	13.3	16.6667	14.9833
84	4.3	4.83333	4.56667			84	4.21	7.012	5.611
85	13.6	14.0333	13.8167			85	57.3	61.5667	59.4333
86	5.4	5.63333	5.51667			86	1.7	9.76667	5.73333
87	23.1	22.7667	22.9333			87	20.5	24.8	22.65
88	10.2	10.5333	10.3667			88	7.7	13.4333	10.5667
90	20.8	21.0667	20.9333			90	18.12	25.2	21.66
92	34.3	29.1667	31.7333			92	26.6	27.3	26.95
93	23.8	26.2333	25.0167			93	25.6	29.1667	27.3833
94	24.2	26.5	25.35			94	26.879	29.1	27.9895
95	31.3	29.9	30.6			95	32.4	26.2333	29.3167
96	27.4	29.1	28.25			96	11.7	9.34	10.52
97	25.7	23.9667	24.8333			97	22.098	23.9333	23.0157
98	28.4	26.3667	27.3833			98	24.5	27.0333	25.7667
99	25.4	28.4667	26.9333			99	33.12	27.4333	30.2767
100	14	11.8	12.9			100	18.7	22.45	20.575
101	17.6	17.2	17.4			101	20.5	14.3333	17.4167
103	20	22.3333	21.1667			103	23.9	24.8	24.35
104	8.9	16.2667	12.5833			104	21.5	18.3	19.9
105	1.4	2.1	1.75			105	2.9	3.23333	3.06667
106	3.6	5.93333	4.76667			106	6.5	8.63333	7.56667
107	25.7	24.3333	25.0167			107	37.9	28.3667	33.1333
108	38.3	32.2333	35.2667			108	34.6	24	29.3
111	29.3	29	29.15			111	40.9	36.7333	38.8167
112	28.9	29.5	29.2			112	22.94	16.9333	19.9367
113	30.6	29.7667	30.1833			113	44.21	33.0163	38.6132
114	33.8	29.0333	31.4167			114	24.934	28.1333	26.5337
115	16	21.3	18.65			115	36.5	30.8667	33.6833
116	26.2	26.6333	26.4167			116	14.3	18.9667	16.6333
117	23.8	24.7667	24.2833			117	17.21	24.0133	20.6117
118	27.5	26.1333	26.8167			118	22.7	27.9333	25.3167
119	31.7	36.7667	34.2333			119	51.4	47.0667	49.2333
122	33.5	31.7	32.6			122	34.78	26.032	30.406
123	19.1	19.5	19.3			123	8.3	20.7	14.5
125	26.9	23.3333	25.1167			125	27.4	34.785	31.0925
126	22.5	23.1	22.8			126	37.068	30.1	33.584
127	16.7	17.5	17.1			127	9.5	14.8333	12.1667
128	16.6	16	16.3			128	17.986	12.8667	15.4263
129	19	18.8333	18.9167			129	11.6	17.5	14.55
130	19.7	21.9667	20.8333			130	21.325	25.6	23.4625
132	24.4	23.2333	23.8167			132	24.9	20.4333	22.6667
135	24	23.7333	23.8667			135	20.8	25.6667	23.2333
136	22.9	22.8	22.85			136	26.5	18.0333	22.2667
137	22.2	27.3333	24.7667			137	31.8	27.4333	29.6167
138	29.9	24.8	27.35			138	24.7	20.1667	22.4333
139	23.1	25.4	24.25			139	23.8	29.4667	26.6333
140	31	33.2333	32.1167			140	36.6	32.8	34.7
141	26.5	27.3333	26.9167			141	31.5	23.89	27.695
143	37.1	34.2667	35.6833			143	29.1	35.7667	32.4333
146	32.5	31.7	32.1			146	33.9	29.6333	31.7667
147	26.4	28.4333	27.4167			147	27.1	32.2667	29.6833
148	27.9	32.5333	30.2167			148	30.3	39.087	34.6935
149	3.8	5.7	4.75			149	9.3	3.87667	6.58833
151	15.5	20.9	18.2			151	21.6	25.9333	23.7667
152	7.8	10	8.9			152	10.4	13.3667	11.8833
153	19.9	18.9333	19.4167			153	17.1	20.4333	18.7667
154	22.6	22.2667	22.4333			154	25.6	18.8	22.2
155	13	17.9	15.45			155	18.32	22.3333	20.3267
156	21.1	18.1	19.6			156	18.3	15.3	16.8
158	32.1	30.4	31.25			158	27.9	31.2333	29.5667
159	23.7	29.7667	26.7333			159	30	34.7333	32.3667
160	30.5	30.4	30.45			160	34.9	26.9333	30.9167
161	38.9	35.0333	36.9667			161	29.9	36.8667	33.3833
162	15.9	18.2667	17.0833			162	21.1	18.69	19.895
163	14	18.2667	16.1333			163	20.6	19.7333	20.1667
165	42.2	38.2667	40.2333			165	35.5	37.6333	36.5667
166	41.4	45.1	43.25			166	45.3	47.6667	46.4833
167	31.3	30.1333	30.7167			167	27.4	30.9667	29.1833
170	31.2	40.1667	35.6833			170	41.4	48.3667	44.8833

## Sheet: Trichome_data
Raw data for trichomes in the RILs (recorded for 2 years)
	Trichomes_2020						Trichomes_2021
RILNo	R1	R2	Mean			RILNo	R1	R2	Mean			Scale	0-3
1	2	2	2			1	3	3	3
2	2	3	2.5			2	3	3	3
3	3	3	3			3	3	3	3
5	2	2	2			5	1	2	2
6	3	3	3			6	2	3	3
7	2	2	2			7	2	2	2
8	0	1	0.5			8	2	2	2
9	2	2	2			9	1	2	2
10	2	3	2.5			10	2	3	3
11	2	2	2			11	1	2	2
12	3	3	3			12	3	3	3
13	2	3	2.5			13	2	3	3
14	3	2	2.5			14	3	1	2
15	3	3	3			15	2	3	3
16	2	2	2			16	2	2	2
17	2	2	2			17	3	0	2
18	3	3	3			18	2	3	3
19	1	1	1			19	0	1	1
20	1	2	1.5			20	3	1	2
21	2	3	2.5			21	2	3	3
22	2	2	2			22	3	1	2
23	3	3	3			23	3	3	3
24	2	2	2			24	2	3	3
25	2	2	2			25	1	2	2
26	3	3	3			26	2	3	3
27	2	1	1.5			27	2	2	2
28	2	1	1.5			28	2	2	2
29	2	2	2			29	1	2	2
30	3	2	2.5			30	2	3	3
31	1	0	0.5			31	2	0	1
32	2	2	2			32	2	2	2
33	2	2	2			33	2	2	2
34	2	2	2			34	3	1	2
35	2	3	2.5			35	3	3	3
36	3	3	3			36	2	3	3
37	2	2	2			37	2	2	2
38	2	2	2			38	1	2	2
39	2	1	1.5			39	1	1	1
40	3	3	3			40	2	0	1
41	3	2	2.5			41	2	3	3
42	2	2	2			42	3	0	2
43	3	3	3			43	2	3	3
44	2	2	2			44	1	2	2
45	1	1	1			45	2	0	1
46	3	3	3			46	3	3	3
47	3	3	3			47	3	3	3
48	2	2	2			48	3	1	2
49	2	3	2.5			49	3	3	3
50	3	3	3			50	2	3	3
51	2	2	2			51	2	2	2
52	2	2	2			52	1	2	2
53	0	2	1			53	1	1	1
54	2	2	2			54	2	2	2
55	2	2	2			55	2	2	2
56	2	2	2			56	3	1	2
57	1	3	2			57	3	3	3
58	3	3	3			58	2	3	3
59	2	1	1.5			59	2	0	1
60	1	1	1			60	2	2	2
61	2	2	2			61	1	2	2
62	2	1	1.5			62	1	1	1
63	2	2	2			63	3	1	2
64	1	3	2			64	2	3	3
65	2	2	2			65	2	2	2
66	2	2	2			66	2	2	2
67	2	2	2			67	1	2	2
68	3	3	3			68	2	3	3
69	2	2	2			69	1	2	2
70	1	1	1			70	0	2	1
71	2	2	2			71	3	1	2
72	2	0	1			72	2	3	3
73	2	2	2			73	2	1	2
74	1	1	1			74	2	3	3
75	3	2	2.5			75	1	2	2
76	2	2	2			76	1	0	1
77	3	3	3			77	2	3	3
78	1	1	1			78	1	2	2
79	2	1	1.5			79	1	1	1
80	2	2	2			80	2	3	3
81	2	1	1.5			81	2	0	1
82	2	2	2			82	1	2	2
83	1	1	1			83	2	0	1
84	2	2	2			84	2	2	2
85	2	2	2			85	2	1	2
86	2	1	1.5			86	1	1	1
87	1	1	1			87	0	2	1
88	3	2	2.5			88	3	1	2
89	3	3	3			89	2	3	3
90	3	2	2.5			90	2	2	2
91	2	2	2			91	1	2	2
92	2	1	1.5			92	1	1	1
93	3	2	2.5			93	0	1	1
94	2	2	2			94	2	2	2
95	2	2	2			95	2	2	2
96	1	2	1.5			96	2	2	2
97	2	2	2			97	2	2	2
98	2	2	2			98	2	1	2
99	3	2	2.5			99	0	2	1
100	2	2	2			100	3	3	3
101	3	2	2.5			101	3	3	3
102	1	1	1			102	1	1	1
103	2	2	2			103	2	2	2
104	2	2	2			104	2	2	2
105	2	3	2.5			105	2	3	3
106	1	1	1			106	2	2	2
107	2	2	2			107	2	2	2
108	2	2	2			108	1	2	2
109	1	1	1			109	0	1	1
111	2	2	2			111	2	2	2
112	2	2	2			112	1	2	2
113	1	1	1			113	1	2	2
114	2	2	2			114	2	1	2
115	1	1	1			115	1	0	1
116	1	1	1			116	1	1	1
117	2	3	2.5			117	2	3	3
118	2	2	2			118	0	3	2
119	2	2	2			119	2	2	2
120	3	2	2.5			120	3	3	3
121	2	2	2			121	1	2	2
122	3	2	2.5			122	2	3	3
123	2	2	2			123	3	1	2
124	2	1	1.5			124	2	2	2
125	3	2	2.5			125	2	3	3
126	2	1	1.5			126	3	1	2
127	3	2	2.5			127	2	0	2
128	2	3	2.5			128	2	3	3
129	2	2	2			129	1	2	2
130	2	1	1.5			130	1	1	1
131	3	3	3			131	2	3	3
132	2	2	2			132	2	2	2
133	2	2	2			133	2	2	2
134	1		1			134	2	2	2
135	2	2	2			135	2	2	2
136	2	2	2			136	2	2	2
137	2	2	2			137	3	1	2
138	2	2	2			138	1	2	2
139	2	3	2.5			139	2	3	3
140	3	2	2.5			140	3	2	3
141	3	0	1.5			141	2	2	2
142	2	3	2.5			142	3	2	3
143	3	3	3			143	2	2	2
144	3	2	2.5			144	2	3	3
145	3	0	1.5			145	1	3	2
146	1	2	1.5			146	1	2	2
147	2	2	2			147	2	2	2
148	2	2	2			148	3	0	2
149	3	1	2			149	2	2	2
151	2	2	2			151	2	2	2
152	2	2	2			152	1	2	2
153	0	1	0.5			153	0	2	1
154	2	2	2			154	1	2	2
155	0	2	1			155	1	1	1
156	1	1	1			156	2	0	1
157	2	0	1			157	1	1	1
158	1	1	1			158	0	2	1
159	2	2	2			159	2	2	2
160	2	3	2.5			160	3	3	3
161	2	2	2			161	1	2	2
162	2	2	2			162	2	2	2
163	2	2	2			163	2	3	3
164	2	2	2			164	2	0	1
165	2	1	1.5			165	3	1	2
166	2	2	2			166	2	2	2
167	2	2	2			167	2	2	2
169	2	3	2.5			169	3	3	3
170	2	2	2			170	2	2	2
