# Supplementary material for: Identification of quantitative trait loci (QTLs) regulating leaf SPAD value and trichome density in mungbean (Vigna radiata L.) using genotyping-by-sequencing (GBS) approach
Source: PeerJ. 2024 Feb 21;12:e16722. doi: 10.7717/peerj.16722 (PMC10893866; doi:10.7717/peerj.16722)
Supplement: Table S1 [file peerj-12-16722-s001.xlsx]

## Sheet: S Table 1
	Table S1. The detailed gene ontology (GO) of thirty-five identified candidate genes.
Sr. No		Interpro ID	GO terms			Orthologous ID (Arabidopsis)
			Biological process	Molecular Function	Cellular Component
1	VRADI07G26610	IPR005018	-	-	-	AT5G47530
2	VRADI07G27270	IPR005835	Glycogen biosynthetic process (GO:0005978)	Glucose-1-phosphate adenylyltransferase activity (GO:0008878)	None	AT5G19220
3	VRADI07G27460	IPR038951	Monoatomic cation transport (GO:0006812)	Monoatomic ion channel activity (GO:0005216)	None	AT2G43950
4	VRADI07G27620	IPR001328	None	Aminoacyl-tRNA hydrolase activity (GO:0004045)	None	AT1G18440
5	VRADI07G28180	IPR000889	Response to oxidative stress (GO:0006979)	Glutathione peroxidase activity (GO:0004602)	None	AT2G43350
6	VRADI07G28430	IPR021163	None	Oxidoreductase activity (GO:0016491)	None	AT4G32360
7	VRADI07G28520	IPR001890	None	RNA binding (GO:0003723)	None	AT2G20020
8	VRADI07G28530	IPR004263	Protein glycosylation (GO:0006486)	Glycosyltransferase activity (GO: 0016757)	None	AT5G03795
9	VRADI07G28660	-	-	-	-	AT4G35985
10	VRADI07G29130	IPR003439	None	ATP binding (GO:0005524)	None	AT3G10670
11	VRADI07G29450	IPR000642	Proteolysis (GO:0006508)	ATP-dependent peptidase activity (GO:0004176)	None	AT4G23940
12	VRADI07G29740	IPR006113	Pentose-phosphate shunt (GO:0006098)	Phosphogluconate dehydrogenase activity (GO:0004616)	None	AT5G41670
13	VRADI07G29860	IPR010251	Chlorophyll biosynthetic process (GO:0015995)	Magnesium protoporphyrin IX methyltransferase activity (GO:0046406)	None	AT4G25080
14	VRADI07G30110	IPR003676	Response to auxin (GO:0009733)	None	None	AT5G50760
15	VRADI07G30210	IPR004333	None	DNA binding (GO:0003677)	None	AT1G76580
16	VRADI07G31080	IPR002885	None	Protein binding (GO:0005515)	None	AT5G61800
17	VRADI07G09390	IPR006593	None	Transmembrane monodehydoascorbate reductase activity (GO:0140575)	None	AT4G18260
18	VRADI07G10060	IPR003851	Regulation of DNA- templated transcription (GO:0006355)	DNA binding (GO:0003677)	None	AT5G66940
19	VRADI07G14170	IPR026057	None	Transferase activity (GO:0016740)	None	AT5G64470
20	VRADI07G14730	IPR005202	-	-	-	AT2G01570
21	VRADI07G14740	IPR003851	Regulation of DNA- templated transcription (GO:0006355)	DNA binding (GO:0003677)	None	AT5G62940
22	VRADI07G15650	IPR001005	None	Binds DNA or protein- protein interaction module	None	AT4G21440
23	VRADI07G16030	IPR003441	Regulation of DNA- templated transcription (GO:0006355)	DNA binding (GO:0003677)	None	AT1G61110
24	VRADI07G16860	IPR001810	None	Protein binding (GO:0005515)	None	AT2G44130
25	VRADI07G17610	IPR005333	None	DNA- binding transcription factor activity (GO:0003700)	None	AT3G02150
26	VRADI07G17620	IPR033334	Regulation of monopolar cell growth (GO:0051513)	None	None	AT1G18620
27	VRADI07G17680	IPR004333	None	DNA binding (GO:0003677)	None	AT1G69170
28	VRADI07G17740	IPR040289	Plasmodesmata-mediated intercellular transport (GO:0010497)	Microtubule binding (GO:0008017)	None	AT5G08120
29	VRADI07G17780	IPR011598	None	Protein dimerization activity (GO:0046983)	None	AT5G08130
30	VRADI07G19810	IPR000504	None	RNA binding (GO:0003723)	None	AT5G19960
31	VRADI07G20260	IPR039455	Stomatal complex development (GO:0010374)	None	None	AT1G61120
32	VRADI07G22030	IPR001005	None	Binds DNA or protein- protein interaction module	None	AT5G57620
33	VRADI07G23450	IPR026057	None	Transferase activity (GO:0016740)	None	AT5G20680
34	VRADI07G24840	IPR044299	Trichome morphogenesis (GO: OO10090)	None	None	AT1G10480
35	VRADI07G24880	IPR006918	Cellulose microfibril organization (GO:0010215)	None	Membrane (GO:0016020)	AT3G16860
