# Supplementary material for: Identification of quantitative trait loci (QTLs) regulating leaf SPAD value and trichome density in mungbean (Vigna radiata L.) using genotyping-by-sequencing (GBS) approach
Source: PeerJ. 2024 Feb 21;12:e16722. doi: 10.7717/peerj.16722 (PMC10893866; doi:10.7717/peerj.16722)
Supplement: Table S2 [file peerj-12-16722-s002.xlsx]

## Sheet: S Table 2
		Table S2. Details of total 186 genes (49 for chlorophyll content; 137 for trichomes) predicted within the 02 major and stable QTL regions regulating chlorophyll content and trichome density in mungbean.
QTL	Ensembl Gene ID	Entrez	Type	Species	Chr	Position (Mbp)	Description
qSPAD-7-1	VRADI07G26460	106768876	protein_coding	Vigna radiata	7	49.8981	gelsolin-related protein of 125 kDa-like isoform X1 [Source:UniProtKB/TrEMBL;Acc:A0A1S3UUH8]
	VRADI07G26510	106765421	protein_coding	Vigna radiata	7	49.9317	TPD1 protein homolog 1-like [Source:UniProtKB/TrEMBL;Acc:A0A1S3UHL0]
	VRADI07G26610	106765705	protein_coding	Vigna radiata	7	49.9772	Cytochrome b561 and DOMON domain-containing protein [Source:UniProtKB/TrEMBL;Acc:A0A1S3UIP3]
	VRADI07G26630	106765535	protein_coding	Vigna radiata	7	49.9873	putative MO25-like protein At5g47540 [Source:UniProtKB/TrEMBL;Acc:A0A1S3UI30]
	VRADI07G26660	106768688	protein_coding	Vigna radiata	7	50.031	E3 ubiquitin-protein ligase UPL5 [Source:UniProtKB/TrEMBL;Acc:A0A1S3UTN4]
	VRADI07G26730	106765623	protein_coding	Vigna radiata	7	50.093	probable carboxylesterase SOBER1-like isoform X1 [Source:UniProtKB/TrEMBL;Acc:A0A1S3UID9]
	VRADI07G26860	106768429	protein_coding	Vigna radiata	7	50.2285	calcium permeable stress-gated cation channel 1 [Source:UniProtKB/TrEMBL;Acc:A0A1S3USK8]
	VRADI07G26900	106767679	protein_coding	Vigna radiata	7	50.2633	uncharacterized protein LOC106767679 [Source:UniProtKB/TrEMBL;Acc:A0A1S3UQ92]
	VRADI07G27030	106766954	protein_coding	Vigna radiata	7	50.3728	ankyrin repeat domain-containing protein 13C isoform X1 [Source:UniProtKB/TrEMBL;Acc:A0A1S3UML9]
	VRADI07G27270	NA	protein_coding	Vigna radiata	7	50.5836	Glucose-1-phosphate adenylyltransferase large subunit 1, chloroplastic [Source:Projected from Arabidopsis thaliana (AT5G19220) UniProtKB/Swiss-Prot;Acc:P55229]
	VRADI07G27460	106769454	protein_coding	Vigna radiata	7	50.8348	outer envelope pore protein 37, chloroplastic [Source:UniProtKB/TrEMBL;Acc:A0A1S3UWV6]
	VRADI07G27620	106768889	protein_coding	Vigna radiata	7	51.1075	peptidyl-tRNA hydrolase, chloroplastic-like [Source:UniProtKB/TrEMBL;Acc:A0A1S3UUH7]
	VRADI07G27670	106767878	protein_coding	Vigna radiata	7	51.1772	lysM domain-containing GPI-anchored protein 1-like isoform X2 [Source:UniProtKB/TrEMBL;Acc:A0A1S3UQN4]
	VRADI07G27680	106765721	protein_coding	Vigna radiata	7	51.1832	zinc finger protein CONSTANS-LIKE 16 [Source:UniProtKB/TrEMBL;Acc:A0A1S3UIZ1]
	VRADI07G27750	106769168	protein_coding	Vigna radiata	7	51.2448	transcription factor BEE 3-like [Source:UniProtKB/TrEMBL;Acc:A0A1S3UW15]
	VRADI07G27790	106769526	protein_coding	Vigna radiata	7	51.2789	AMSH-like ubiquitin thioesterase 1 [Source:UniProtKB/TrEMBL;Acc:A0A1S3UX87]
	VRADI07G27840	106766894	protein_coding	Vigna radiata	7	51.3231	protein SAR DEFICIENT 1-like [Source:UniProtKB/TrEMBL;Acc:A0A1S3UMD8]
	VRADI07G27920	106767176	protein_coding	Vigna radiata	7	51.4233	protein PLANT CADMIUM RESISTANCE 2-like [Source:UniProtKB/TrEMBL;Acc:A0A1S3UNC3]
	VRADI07G27960	106769044	protein_coding	Vigna radiata	7	51.4386	F-box protein SKIP28 [Source:UniProtKB/TrEMBL;Acc:A0A1S3UV78]
	VRADI07G27990	106769406	protein_coding	Vigna radiata	7	51.465	plant UBX domain-containing protein 2 [Source:UniProtKB/TrEMBL;Acc:A0A1S3UWP1]
	VRADI07G28010	106765498	protein_coding	Vigna radiata	7	51.4763	cysteine-rich repeat secretory protein 12 [Source:UniProtKB/TrEMBL;Acc:A0A1S3UI55]
	VRADI07G28060	106769225	protein_coding	Vigna radiata	7	51.563	ubiquitin fusion degradation protein 1 homolog [Source:UniProtKB/TrEMBL;Acc:A0A1S3UVW8]
	VRADI07G28070	106769140	protein_coding	Vigna radiata	7	51.5696	ankyrin repeat-containing protein At2g01680-like [Source:UniProtKB/TrEMBL;Acc:A0A1S3UVJ2]
	VRADI07G28120	106766740	protein_coding	Vigna radiata	7	51.604	microtubule-associated protein 70-2-like [Source:UniProtKB/TrEMBL;Acc:A0A1S3ULU1]
	VRADI07G28130	106766741	protein_coding	Vigna radiata	7	51.6108	uncharacterized protein LOC106766741 [Source:UniProtKB/TrEMBL;Acc:A0A1S3ULM1]
	VRADI07G28180	NA	protein_coding	Vigna radiata	7	51.656	Probable glutathione peroxidase 2 [Source:Projected from Arabidopsis thaliana (AT2G31570) UniProtKB/Swiss-Prot;Acc:O04922]
	VRADI07G28400	106765763	protein_coding	Vigna radiata	7	52.1	cyclin-dependent kinase F-1-like [Source:UniProtKB/TrEMBL;Acc:A0A1S3UIW9]
	VRADI07G28430	NA	protein_coding	Vigna radiata	7	52.1427	NADPH:adrenodoxin oxidoreductase, mitochondrial [Source:Projected from Arabidopsis thaliana (AT4G32360) UniProtKB/Swiss-Prot;Acc:Q8W3L1]
	VRADI07G28520	106769180	protein_coding	Vigna radiata	7	52.2905	CRS2-associated factor 1, chloroplastic-like [Source:UniProtKB/TrEMBL;Acc:A0A1S3UW99]
	VRADI07G28530	106769553	protein_coding	Vigna radiata	7	52.2947	probable glycosyltransferase At5g03795 isoform X1 [Source:UniProtKB/TrEMBL;Acc:A0A1S3UX91]
	VRADI07G28620	106766632	protein_coding	Vigna radiata	7	52.3775	agamous-like MADS-box protein AGL29 [Source:UniProtKB/TrEMBL;Acc:A0A1S3ULJ7]
	VRADI07G28660	106767497	protein_coding	Vigna radiata	7	52.4046	uncharacterized protein LOC106767497 isoform X1 [Source:UniProtKB/TrEMBL;Acc:A0A1S3UP90]
	VRADI07G28800	106765382	protein_coding	Vigna radiata	7	52.5505	mitochondrial-processing peptidase subunit alpha-like [Source:UniProtKB/TrEMBL;Acc:A0A1S3UHF9]
	VRADI07G28890	106767278	protein_coding	Vigna radiata	7	52.6558	60S ribosomal protein L31 [Source:UniProtKB/TrEMBL;Acc:A0A1S3UNH1]
	VRADI07G29040	106766895	protein_coding	Vigna radiata	7	52.7771	tetraspanin-2-like [Source:UniProtKB/TrEMBL;Acc:A0A1S3UM75]
	VRADI07G29050	106767723	protein_coding	Vigna radiata	7	52.7844	cytidine deaminase 1-like [Source:UniProtKB/TrEMBL;Acc:A0A1S3UQ09]
	VRADI07G29130	NA	protein_coding	Vigna radiata	7	52.8622	ABC transporter I family member 6, chloroplastic [Source:Projected from Arabidopsis thaliana (AT3G10670) UniProtKB/Swiss-Prot;Acc:Q9CAF5]
	VRADI07G29150	106767599	protein_coding	Vigna radiata	7	52.8806	mitochondrial import receptor subunit TOM7-1-like [Source:UniProtKB/TrEMBL;Acc:A0A1S3UPL2]
	VRADI07G29280	106768781	protein_coding	Vigna radiata	7	53.0226	WD repeat-containing protein 44-like [Source:UniProtKB/TrEMBL;Acc:A0A1S3UUK5]
	VRADI07G29390	106766866	protein_coding	Vigna radiata	7	53.1381	3-oxoacyl-[acyl-carrier-protein] synthase I, chloroplastic-like [Source:UniProtKB/TrEMBL;Acc:A0A1S3UMA4]
	VRADI07G29450	NA	protein_coding	Vigna radiata	7	53.1747	Probable inactive ATP-dependent zinc metalloprotease FTSHI 1, chloroplastic [Source:Projected from Arabidopsis thaliana (AT4G23940) UniProtKB/Swiss-Prot;Acc:O22993]
	VRADI07G29740	106768317	protein_coding	Vigna radiata	7	53.449	6-phosphogluconate dehydrogenase, decarboxylating [Source:UniProtKB/TrEMBL;Acc:A0A1S3USC5]
	VRADI07G29860	106768779	protein_coding	Vigna radiata	7	53.5727	magnesium protoporphyrin IX methyltransferase, chloroplastic [Source:UniProtKB/TrEMBL;Acc:A0A1S3UU32]
	VRADI07G29900	106768189	protein_coding	Vigna radiata	7	53.6431	transcription factor ICE1-like isoform X1 [Source:UniProtKB/TrEMBL;Acc:A0A1S3URM7]
	VRADI07G30110	106766658	protein_coding	Vigna radiata	7	53.9283	auxin-responsive protein SAUR71-like [Source:UniProtKB/TrEMBL;Acc:A0A1S3ULC6]
	VRADI07G30210	106768860	protein_coding	Vigna radiata	7	54.0721	squamosa promoter-binding-like protein 13A [Source:UniProtKB/TrEMBL;Acc:A0A1S3UUK8]
	VRADI07G30410	106767642	protein_coding	Vigna radiata	7	54.2339	protein LURP-one-related 4-like [Source:UniProtKB/TrEMBL;Acc:A0A1S3UPY7]
	VRADI07G30550	106765600	protein_coding	Vigna radiata	7	54.3394	sugar phosphatase YfbT [Source:UniProtKB/TrEMBL;Acc:A0A1S3UIA1]
			Candidate genes related to trichome
QTL	Ensembl Gene ID	Entrez	Type	Species	Chr	Position (Mbp)	Description
qTric-7-2	VRADI07G06270	106766686	protein_coding	Vigna radiata	7	14.0985	cyclic dof factor 1-like isoform X2 [Source:UniProtKB/TrEMBL;Acc:A0A1S3ULL7]
	VRADI07G07220	106769047	protein_coding	Vigna radiata	7	16.4467	Chloride channel protein [Source:UniProtKB/TrEMBL;Acc:A0A1S3UVR3]
	VRADI07G07250	106768082	protein_coding	Vigna radiata	7	16.5527	putative calcium-binding protein CML19 [Source:UniProtKB/TrEMBL;Acc:A0A1S3UR21]
	VRADI07G07460	106768384	protein_coding	Vigna radiata	7	17.0483	Serine/threonine protein phosphatase 2A regulatory subunit [Source:UniProtKB/TrEMBL;Acc:A0A1S3USQ5]
	VRADI07G07690	106769396	protein_coding	Vigna radiata	7	18.2656	probable mannitol dehydrogenase [Source:UniProtKB/TrEMBL;Acc:A0A1S3UX83]
	VRADI07G08030	106766157	protein_coding	Vigna radiata	7	19.7132	chalcone synthase-like [Source:UniProtKB/TrEMBL;Acc:A0A1S3UK35]
	VRADI07G08140	106767591	protein_coding	Vigna radiata	7	20.0994	phospholipase A1-IIgamma-like [Source:UniProtKB/TrEMBL;Acc:A0A1S3UPS8]
	VRADI07G08430	106767023	protein_coding	Vigna radiata	7	21.8821	Peroxidase [Source:UniProtKB/TrEMBL;Acc:A0A1S3UMU3]
	VRADI07G08440	106765524	protein_coding	Vigna radiata	7	21.8998	Ornithine aminotransferase [Source:UniProtKB/TrEMBL;Acc:A0A1S3UI13]
	VRADI07G08550	106765389	protein_coding	Vigna radiata	7	22.3314	heterodimeric geranylgeranyl pyrophosphate synthase small subunit, chloroplastic [Source:UniProtKB/TrEMBL;Acc:A0A1S3UHG7]
	VRADI07G09110	106765788	protein_coding	Vigna radiata	7	24.2856	V-type proton ATPase subunit F [Source:UniProtKB/TrEMBL;Acc:A0A1S3UIZ6]
	VRADI07G09190	106766214	protein_coding	Vigna radiata	7	24.5182	isoflavone 3'-hydroxylase-like [Source:UniProtKB/TrEMBL;Acc:A0A1S3UK83]
	VRADI07G09210	106766216	protein_coding	Vigna radiata	7	24.5996	transcription factor bHLH91-like [Source:UniProtKB/TrEMBL;Acc:A0A1S3UKI8]
	VRADI07G09320	106769308	protein_coding	Vigna radiata	7	24.8055	tobamovirus multiplication protein 1 [Source:UniProtKB/TrEMBL;Acc:A0A1S3UWM2]
	VRADI07G09410	106768011	protein_coding	Vigna radiata	7	25.0748	gibberellin 2-beta-dioxygenase-like [Source:UniProtKB/TrEMBL;Acc:A0A1S3UR54]
	VRADI07G09530	106768704	protein_coding	Vigna radiata	7	25.644	ATP-dependent zinc metalloprotease FTSH 2, chloroplastic [Source:UniProtKB/TrEMBL;Acc:A0A1S3UTN7]
	VRADI07G09640	106765608	protein_coding	Vigna radiata	7	25.9688	6,7-dimethyl-8-ribityllumazine synthase [Source:UniProtKB/TrEMBL;Acc:A0A1S3UIB7]
	VRADI07G09670	106766877	protein_coding	Vigna radiata	7	26.1128
	VRADI07G09690	106767975	protein_coding	Vigna radiata	7	26.1705	RING-H2 finger protein ATL74-like [Source:UniProtKB/TrEMBL;Acc:A0A1S3UQT7]
	VRADI07G10060	NA	protein_coding	Vigna radiata	7	26.8895	Dof zinc finger protein DOF5.8 [Source:Projected from Arabidopsis thaliana (AT5G66940) UniProtKB/Swiss-Prot;Acc:Q9FGD6]
	VRADI07G10080	106767882	protein_coding	Vigna radiata	7	26.9149	salicylic acid-binding protein 2-like isoform X2 [Source:UniProtKB/TrEMBL;Acc:A0A1S3UQJ4]
	VRADI07G10180	106768721	protein_coding	Vigna radiata	7	27.0489	probable disease resistance protein At5g66900 isoform X2 [Source:UniProtKB/TrEMBL;Acc:A0A1S3UTZ5]
	VRADI07G10200	106766247	protein_coding	Vigna radiata	7	27.0788	pollen receptor-like kinase 1 [Source:UniProtKB/TrEMBL;Acc:A0A1S3UKB5]
	VRADI07G10230	106766958	protein_coding	Vigna radiata	7	27.1319	uncharacterized protein LOC106766958 isoform X1 [Source:UniProtKB/TrEMBL;Acc:A0A1S3UMM4]
	VRADI07G10520	106765845	protein_coding	Vigna radiata	7	27.5101	heat shock factor protein HSF24-like [Source:UniProtKB/TrEMBL;Acc:A0A1S3UJ82]
	VRADI07G10590	106767156	protein_coding	Vigna radiata	7	27.6204	mitogen-activated protein kinase kinase kinase 3 [Source:UniProtKB/TrEMBL;Acc:A0A1S3UNG2]
	VRADI07G10660	106768479	protein_coding	Vigna radiata	7	27.7967	filament-like plant protein 7 [Source:UniProtKB/TrEMBL;Acc:A0A1S3UT40]
	VRADI07G10870	106766262	protein_coding	Vigna radiata	7	28.1795	Glycosyltransferase [Source:UniProtKB/TrEMBL;Acc:A0A1S3UKM9]
	VRADI07G11030	106766929	protein_coding	Vigna radiata	7	28.4358	probable esterase KAI2 [Source:UniProtKB/TrEMBL;Acc:A0A1S3UMC1]
	VRADI07G11110	106769351	protein_coding	Vigna radiata	7	28.5234	BTB/POZ domain-containing protein At5g67385-like [Source:UniProtKB/TrEMBL;Acc:A0A1S3UWU0]
	VRADI07G11160	106766913	protein_coding	Vigna radiata	7	28.6218	LOB domain-containing protein 37 [Source:UniProtKB/TrEMBL;Acc:A0A1S3UMF7]
	VRADI07G11200	106768635	protein_coding	Vigna radiata	7	28.6918	BTB/POZ domain-containing protein NPY4-like [Source:UniProtKB/TrEMBL;Acc:A0A1S3UTM8]
	VRADI07G11310	106765491	protein_coding	Vigna radiata	7	28.8066	telomere repeat-binding factor 2 isoform X2 [Source:UniProtKB/TrEMBL;Acc:A0A1S3UHW2]
	VRADI07G11380	106767413	protein_coding	Vigna radiata	7	28.9227	DNA-directed RNA polymerases II and IV subunit 5A-like [Source:UniProtKB/TrEMBL;Acc:A0A1S3UP51]
	VRADI07G11530	106765563	protein_coding	Vigna radiata	7	29.1752	lysosomal Pro-X carboxypeptidase-like [Source:UniProtKB/TrEMBL;Acc:A0A1S3UI68]
	VRADI07G11540	106766795	protein_coding	Vigna radiata	7	29.2	homeobox-leucine zipper protein HAT22 [Source:UniProtKB/TrEMBL;Acc:A0A1S3UM15]
	VRADI07G11610	106765710	protein_coding	Vigna radiata	7	29.371	transcription factor bHLH18-like isoform X2 [Source:UniProtKB/TrEMBL;Acc:A0A1S3UIP5]
	VRADI07G11630	106767246	protein_coding	Vigna radiata	7	29.419	transcription factor bHLH18-like [Source:UniProtKB/TrEMBL;Acc:A0A1S3UNE0]
	VRADI07G12120	106769581	protein_coding	Vigna radiata	7	30.2699	uncharacterized protein LOC106769581 [Source:UniProtKB/TrEMBL;Acc:A0A1S3UXQ1]
	VRADI07G12130	106769221	protein_coding	Vigna radiata	7	30.2752	ATP-dependent Clp protease proteolytic subunit [Source:UniProtKB/TrEMBL;Acc:A0A1S3UWG2]
	VRADI07G12300	106767359	protein_coding	Vigna radiata	7	30.5315	deSI-like protein At4g17486 [Source:UniProtKB/TrEMBL;Acc:A0A1S3UP00]
	VRADI07G12360	106768724	protein_coding	Vigna radiata	7	30.6242	transcription factor MYB1R1 [Source:UniProtKB/TrEMBL;Acc:A0A1S3UU45]
	VRADI07G12400	106768015	protein_coding	Vigna radiata	7	30.7081	transcription factor MYB114-like [Source:UniProtKB/TrEMBL;Acc:A0A1S3UQV8]
	VRADI07G12800	106768564	protein_coding	Vigna radiata	7	31.3282	Elongation factor G, chloroplastic [Source:UniProtKB/TrEMBL;Acc:A0A1S3UTP7]
	VRADI07G12820	106766872	protein_coding	Vigna radiata	7	31.3516	non-specific lipid-transfer protein [Source:UniProtKB/TrEMBL;Acc:A0A1S3UMA2]
	VRADI07G12920	106766930	protein_coding	Vigna radiata	7	31.4639	Histone H2B [Source:UniProtKB/TrEMBL;Acc:A0A1S3UMH7]
	VRADI07G13100	106773528	protein_coding	Vigna radiata	7	31.6953	40S ribosomal protein S13 [Source:UniProtKB/TrEMBL;Acc:A0A1S3UTL9]
	VRADI07G13310	106766308	protein_coding	Vigna radiata	7	31.9741	Protein DETOXIFICATION [Source:UniProtKB/TrEMBL;Acc:A0A1S3UKG9]
	VRADI07G13320	106768013	protein_coding	Vigna radiata	7	31.9956	BAG family molecular chaperone regulator 1-like [Source:UniProtKB/TrEMBL;Acc:A0A1S3UQX5]
	VRADI07G13350	106769171	protein_coding	Vigna radiata	7	32.0358	scarecrow-like protein 28 [Source:UniProtKB/TrEMBL;Acc:A0A1S3UVP2]
	VRADI07G13440	106767762	protein_coding	Vigna radiata	7	32.124	protein SHOOT GRAVITROPISM 5 [Source:UniProtKB/TrEMBL;Acc:A0A1S3UQI8]
	VRADI07G13610	106768438	protein_coding	Vigna radiata	7	32.3104	cyclin-dependent kinase 11-like [Source:UniProtKB/TrEMBL;Acc:A0A1S3USN3]
	VRADI07G13860	106765747	protein_coding	Vigna radiata	7	33.2183	fructose-1,6-bisphosphatase, chloroplastic [Source:UniProtKB/TrEMBL;Acc:A0A1S3UIU7]
	VRADI07G14170	NA	protein_coding	Vigna radiata	7	33.8122	Protein trichome birefringence-like 12 [Source:Projected from Arabidopsis thaliana (AT5G64470) UniProtKB/Swiss-Prot;Acc:Q9FGE9]
	VRADI07G14310	106765568	protein_coding	Vigna radiata	7	34.1362	probably inactive leucine-rich repeat receptor-like protein kinase At5g48380 [Source:UniProtKB/TrEMBL;Acc:A0A1S3UI74]
	VRADI07G14320	106765569	protein_coding	Vigna radiata	7	34.1363	basic form of pathogenesis-related protein 1-like [Source:UniProtKB/TrEMBL;Acc:A0A1S3UI76]
	VRADI07G14400	106768343	protein_coding	Vigna radiata	7	34.265	iron-sulfur cluster co-chaperone protein HscB, mitochondrial-like [Source:UniProtKB/TrEMBL;Acc:A0A1S3US56]
	VRADI07G14520	106769106	protein_coding	Vigna radiata	7	34.5734	28 kDa ribonucleoprotein, chloroplastic [Source:UniProtKB/TrEMBL;Acc:A0A1S3UVT1]
	VRADI07G14640	106769166	protein_coding	Vigna radiata	7	34.7132	zinc finger CCCH domain-containing protein 43-like [Source:UniProtKB/TrEMBL;Acc:A0A1S3UVU8]
	VRADI07G14650	106768827	protein_coding	Vigna radiata	7	34.7251	GDSL esterase/lipase At3g48460 [Source:UniProtKB/TrEMBL;Acc:A0A1S3UU94]
	VRADI07G14730	106766362	protein_coding	Vigna radiata	7	34.7713	DELLA protein RGL1-like [Source:UniProtKB/TrEMBL;Acc:A0A1S3UKM3]
	VRADI07G14740	106767229	protein_coding	Vigna radiata	7	34.7931	dof zinc finger protein DOF5.6 [Source:UniProtKB/TrEMBL;Acc:A0A1S3UNP2]
	VRADI07G14980	106767632	protein_coding	Vigna radiata	7	35.0693	WAT1-related protein [Source:UniProtKB/TrEMBL;Acc:A0A1S3UPP4]
	VRADI07G15500	106767121	protein_coding	Vigna radiata	7	35.7964	HVA22-like protein [Source:UniProtKB/TrEMBL;Acc:A0A1S3UN70]
	VRADI07G15650	106767224	protein_coding	Vigna radiata	7	36.2065	transcription factor MYB86-like [Source:UniProtKB/TrEMBL;Acc:A0A1S3UNH3]
	VRADI07G15740	106767088	protein_coding	Vigna radiata	7	36.4404	F-box protein At1g61340-like [Source:UniProtKB/TrEMBL;Acc:A0A1S3UMV8]
	VRADI07G15890	106769110	protein_coding	Vigna radiata	7	36.6328	Secretory carrier-associated membrane protein [Source:UniProtKB/TrEMBL;Acc:A0A1S3UVG5]
	VRADI07G16030	106766852	protein_coding	Vigna radiata	7	36.8867	NAC transcription factor 25-like [Source:UniProtKB/TrEMBL;Acc:A0A1S3UM14]
	VRADI07G16160	106765615	protein_coding	Vigna radiata	7	37.1752	pentatricopeptide repeat-containing protein At5g14770, mitochondrial [Source:UniProtKB/TrEMBL;Acc:A0A1S3UIC1]
	VRADI07G16610	106768271	protein_coding	Vigna radiata	7	37.9062	uncharacterized protein LOC106768271 isoform X1 [Source:UniProtKB/TrEMBL;Acc:A0A1S3US48]
	VRADI07G16700	106766999	protein_coding	Vigna radiata	7	38.0982	FHA domain-containing protein At4g14490-like [Source:UniProtKB/TrEMBL;Acc:A0A1S3UMR2]
	VRADI07G16830	106768349	protein_coding	Vigna radiata	7	38.2647	Serine/threonine-protein phosphatase [Source:UniProtKB/TrEMBL;Acc:A0A1S3USI2]
	VRADI07G16850	106767065	protein_coding	Vigna radiata	7	38.2814	probable polyamine transporter At3g13620 [Source:UniProtKB/TrEMBL;Acc:A0A1S3UMZ2]
	VRADI07G16860	106767243	protein_coding	Vigna radiata	7	38.3088	F-box/kelch-repeat protein At2g44130-like [Source:UniProtKB/TrEMBL;Acc:A0A1S3UNJ8]
	VRADI07G17010	106766410	protein_coding	Vigna radiata	7	38.4398	probable arabinosyltransferase ARAD1 [Source:UniProtKB/TrEMBL;Acc:A0A1S3UKQ6]
	VRADI07G17130	106765511	protein_coding	Vigna radiata	7	38.5344	galactoside 2-alpha-L-fucosyltransferase-like [Source:UniProtKB/TrEMBL;Acc:A0A1S3UHZ1]
	VRADI07G17180	106769035	protein_coding	Vigna radiata	7	38.5766	two-component response regulator-like APRR1 isoform X1 [Source:UniProtKB/TrEMBL;Acc:A0A1S3UVB3]
	VRADI07G17290	106767643	protein_coding	Vigna radiata	7	38.7255	dCTP pyrophosphatase 1-like [Source:UniProtKB/TrEMBL;Acc:A0A1S3UPR7]
	VRADI07G17610	106767549	protein_coding	Vigna radiata	7	38.9832	transcription factor TCP5 [Source:UniProtKB/TrEMBL;Acc:A0A1S3UPG3]
	VRADI07G17620	106768753	protein_coding	Vigna radiata	7	38.9887	protein LONGIFOLIA 2-like isoform X1 [Source:UniProtKB/TrEMBL;Acc:A0A1S3UU31]
	VRADI07G17680	106769314	protein_coding	Vigna radiata	7	39.0572
	VRADI07G17740	NA	protein_coding	Vigna radiata	7	39.1287	MPB2C [Source:Projected from Arabidopsis thaliana (AT5G08120) UniProtKB/TrEMBL;Acc:A0A178UL06]
	VRADI07G17780	NA	protein_coding	Vigna radiata	7	39.1713	basic helix-loop-helix (bHLH) DNA-binding superfamily protein [Source:Projected from Arabidopsis thaliana (AT5G08130) TAIR;Acc:AT5G08130]
	VRADI07G17800	106767149	protein_coding	Vigna radiata	7	39.2138	E3 ubiquitin-protein ligase CIP8 [Source:UniProtKB/TrEMBL;Acc:A0A1S3UNA0]
	VRADI07G17920	106768467	protein_coding	Vigna radiata	7	39.3686	probable calcium-binding protein CML15 [Source:UniProtKB/TrEMBL;Acc:A0A1S3UT26]
	VRADI07G17940	106768647	protein_coding	Vigna radiata	7	39.3924	G patch domain-containing protein TGH [Source:UniProtKB/TrEMBL;Acc:A0A1S3UTP2]
	VRADI07G18020	106768500	protein_coding	Vigna radiata	7	39.4741	peptidyl-prolyl cis-trans isomerase CYP26-2, chloroplastic isoform X1 [Source:UniProtKB/TrEMBL;Acc:A0A1S3USW4]
	VRADI07G18150	106768730	protein_coding	Vigna radiata	7	39.6279	uncharacterized protein LOC106768730 [Source:UniProtKB/TrEMBL;Acc:A0A1S3UTS5]
	VRADI07G18170	106766855	protein_coding	Vigna radiata	7	39.6447	transcription factor DIVARICATA [Source:UniProtKB/TrEMBL;Acc:A0A1S3UM88]
	VRADI07G18270	106768968	protein_coding	Vigna radiata	7	39.7995	sodium/pyruvate cotransporter BASS2, chloroplastic isoform X1 [Source:UniProtKB/TrEMBL;Acc:A0A1S3UV19]
	VRADI07G18290	106765503	protein_coding	Vigna radiata	7	39.8205	subtilisin-like protease SBT2.5 isoform X1 [Source:UniProtKB/TrEMBL;Acc:A0A1S3UHX9]
	VRADI07G19810	106765376	protein_coding	Vigna radiata	7	42.0331	zinc finger CCCH domain-containing protein 25 [Source:UniProtKB/TrEMBL;Acc:A0A1S3UHE4]
	VRADI07G20050	106766964	protein_coding	Vigna radiata	7	42.3549	zinc finger CCCH domain-containing protein 32-like [Source:UniProtKB/TrEMBL;Acc:A0A1S3UMM3]
	VRADI07G20140	106769207	protein_coding	Vigna radiata	7	42.4288	protein NRT1/ PTR FAMILY 6.2 [Source:UniProtKB/TrEMBL;Acc:A0A1S3UVT7]
	VRADI07G20260	NA	protein_coding	Vigna radiata	7	42.5605	EPIDERMAL PATTERNING FACTOR-like protein 8 isoform X1 [Source:UniProtKB/TrEMBL;Acc:A0A1S3UPD6]
	VRADI07G20290	106768825	protein_coding	Vigna radiata	7	42.5887	equilibrative nucleotide transporter 8 [Source:UniProtKB/TrEMBL;Acc:A0A1S3UUA6]
	VRADI07G20780	106768511	protein_coding	Vigna radiata	7	43.2705	nucleolin-like [Source:UniProtKB/TrEMBL;Acc:A0A1S3USW2]
	VRADI07G21070	106765446	protein_coding	Vigna radiata	7	43.6188	DNA helicase [Source:UniProtKB/TrEMBL;Acc:A0A1S3UHQ0]
	VRADI07G21100	106765490	protein_coding	Vigna radiata	7	43.7265	Defective in cullin neddylation protein [Source:UniProtKB/TrEMBL;Acc:A0A1S3UHV7]
	VRADI07G21190	106768468	protein_coding	Vigna radiata	7	43.8011	FIP1[V]-like protein [Source:UniProtKB/TrEMBL;Acc:A0A1S3USQ7]
	VRADI07G21240	106768525	protein_coding	Vigna radiata	7	43.8829	NADP-dependent glyceraldehyde-3-phosphate dehydrogenase [Source:UniProtKB/TrEMBL;Acc:A0A1S3UTA0]
	VRADI07G21340	106769571	protein_coding	Vigna radiata	7	44.0231	probable GMP synthase [glutamine-hydrolyzing] [Source:UniProtKB/TrEMBL;Acc:A0A1S3UXA9]
	VRADI07G21440	106766848	protein_coding	Vigna radiata	7	44.1121	F-box protein SKIP1 [Source:UniProtKB/TrEMBL;Acc:A0A1S3UM10]
	VRADI07G21470	106769403	protein_coding	Vigna radiata	7	44.1408	heat shock 70 kDa protein [Source:UniProtKB/TrEMBL;Acc:A0A1S3UWN7]
	VRADI07G21780	106767554	protein_coding	Vigna radiata	7	44.5237	VAN3-binding protein [Source:UniProtKB/TrEMBL;Acc:A0A1S3UPN6]
	VRADI07G22010	106767356	protein_coding	Vigna radiata	7	44.8773	pathogenesis-related protein PR-1-like [Source:UniProtKB/TrEMBL;Acc:A0A1S3UP46]
	VRADI07G22030	106767894	protein_coding	Vigna radiata	7	44.8932	transcription factor RAX1 isoform X1 [Source:UniProtKB/TrEMBL;Acc:A0A1S3UQJ0]
	VRADI07G22440	106766496	protein_coding	Vigna radiata	7	45.4076	spermidine hydroxycinnamoyl transferase [Source:UniProtKB/TrEMBL;Acc:A0A1S3UL09]
	VRADI07G22590	106765622	protein_coding	Vigna radiata	7	45.6065	RNA-binding KH domain-containing protein PEPPER-like [Source:UniProtKB/TrEMBL;Acc:A0A1S3UIL6]
	VRADI07G22710	106768130	protein_coding	Vigna radiata	7	45.7437	pentatricopeptide repeat-containing protein At2g37320-like [Source:UniProtKB/TrEMBL;Acc:A0A1S3URE0]
	VRADI07G22990	106766960	protein_coding	Vigna radiata	7	46.0827	IQ domain-containing protein IQM1-like [Source:UniProtKB/TrEMBL;Acc:A0A1S3UML8]
	VRADI07G23030	106768812	protein_coding	Vigna radiata	7	46.1119	eukaryotic initiation factor 4A-15 [Source:UniProtKB/TrEMBL;Acc:A0A1S3UUJ1]
	VRADI07G23130	106765733	protein_coding	Vigna radiata	7	46.2144	WD repeat-containing protein VIP3 [Source:UniProtKB/TrEMBL;Acc:A0A1S3UJ10]
	VRADI07G23140	106769504	protein_coding	Vigna radiata	7	46.2185	threonine synthase 1, chloroplastic-like [Source:UniProtKB/TrEMBL;Acc:A0A1S3UXE2]
	VRADI07G23400	106769101	protein_coding	Vigna radiata	7	46.4977	serine/threonine-protein kinase At5g01020-like [Source:UniProtKB/TrEMBL;Acc:A0A1S3UVL0]
	VRADI07G23420	106767571	protein_coding	Vigna radiata	7	46.5329	guanine nucleotide-binding protein subunit gamma 3 [Source:UniProtKB/TrEMBL;Acc:A0A1S3UPQ8]
	VRADI07G23450	106769453	protein_coding	Vigna radiata	7	46.5686	protein trichome birefringence-like 14 [Source:UniProtKB/TrEMBL;Acc:A0A1S3UWY9]
	VRADI07G23520	106767080	protein_coding	Vigna radiata	7	46.622	protein TIFY 10A [Source:UniProtKB/TrEMBL;Acc:A0A1S3UMU8]
	VRADI07G23860	106766908	protein_coding	Vigna radiata	7	47.033	protein TIFY 3B [Source:UniProtKB/TrEMBL;Acc:A0A1S3UMF2]
	VRADI07G23880	106765772	protein_coding	Vigna radiata	7	47.0462	protein FATTY ACID EXPORT 2, chloroplastic [Source:UniProtKB/TrEMBL;Acc:A0A1S3UIX0]
	VRADI07G23890	106766902	protein_coding	Vigna radiata	7	47.0842	rhomboid-like protein 14, mitochondrial isoform X3 [Source:UniProtKB/TrEMBL;Acc:A0A1S3UMF3]
	VRADI07G23980	106767398	protein_coding	Vigna radiata	7	47.198	glutathione S-transferase U25-like [Source:UniProtKB/TrEMBL;Acc:A0A1S3UNW5]
	VRADI07G24130	106766727	protein_coding	Vigna radiata	7	47.3601	probable sugar phosphate/phosphate translocator At3g17430 [Source:UniProtKB/TrEMBL;Acc:A0A1S3ULR8]
	VRADI07G24630	106768010	protein_coding	Vigna radiata	7	47.9758	Dirigent protein [Source:UniProtKB/TrEMBL;Acc:A0A1S3UQX1]
	VRADI07G24740	106765847	protein_coding	Vigna radiata	7	48.0875	zinc finger CCHC domain-containing protein 10-like [Source:UniProtKB/TrEMBL;Acc:A0A1S3UJ75]
	VRADI07G24840	106766530	protein_coding	Vigna radiata	7	48.1996	zinc finger protein 6-like [Source:UniProtKB/TrEMBL;Acc:A0A1S3UL20]
	VRADI07G24860	106768863	protein_coding	Vigna radiata	7	48.2155	Importin subunit alpha [Source:UniProtKB/TrEMBL;Acc:A0A1S3UUE2]
	VRADI07G24880	106769012	protein_coding	Vigna radiata	7	48.2355	COBRA-like protein 7 [Source:UniProtKB/TrEMBL;Acc:A0A1S3UV79]
	VRADI07G24990	106767459	protein_coding	Vigna radiata	7	48.3769	ethylene-responsive transcription factor RAP2-3-like isoform X1 [Source:UniProtKB/TrEMBL;Acc:A0A1S3UPD2]
	VRADI07G25600	106768420	protein_coding	Vigna radiata	7	48.994	probable serine/threonine-protein kinase At1g54610 [Source:UniProtKB/TrEMBL;Acc:A0A1S3USR4]
	VRADI07G25830	106768965	protein_coding	Vigna radiata	7	49.2254
	VRADI07G26300	106767131	protein_coding	Vigna radiata	7	49.7383	glucan endo-1,3-beta-glucosidase 5-like [Source:UniProtKB/TrEMBL;Acc:A0A1S3UN10]
	VRADI07G26630	106765535	protein_coding	Vigna radiata	7	49.9873	putative MO25-like protein At5g47540 [Source:UniProtKB/TrEMBL;Acc:A0A1S3UI30]
	VRADI07G26760	106767212	protein_coding	Vigna radiata	7	50.1192	tropinone reductase-like 3 [Source:UniProtKB/TrEMBL;Acc:A0A1S3UNM1]
	VRADI07G26920	106768521	protein_coding	Vigna radiata	7	50.2826	S-type anion channel SLAH4-like [Source:UniProtKB/TrEMBL;Acc:A0A1S3UT95]
	VRADI07G27170	106768699	protein_coding	Vigna radiata	7	50.4835	polyadenylate-binding protein RBP45 [Source:UniProtKB/TrEMBL;Acc:A0A1S3UTN2]
